# Supplementary material for: Variants of ADRA2A are associated with fasting glucose, blood pressure, body mass index and type 2 diabetes risk: meta-analysis of four prospective studies
Source: PubMed Central journal article supplement — Diabetologia. 2011 Apr 1;54(7):1710–9. doi: 10.1007/s00125-011-2108-6 (PMC3110279; doi:10.1007/s00125-011-2108-6), 2011-04-01
Supplement: 125_2011_2108_MOESM2_ESM.pdf [file 125_2011_2108_MOESM2_ESM.pdf]

**Electronic supplementary material**

**ESM Table 1** Haplotype analysis of *ADRA2A* rs553668 and rs1088522 analysis in WHII

| rs553668/ rs10885122     | Frequency | Mean  | Lower CI | Upper CI | B (SE)         | <i>p</i> value          |
|--------------------------|-----------|-------|----------|----------|----------------|-------------------------|
| Glucose                  |           |       |          |          |                |                         |
| GG                       | 0.719     | 2.63  | 2.62     | 2.64     |                | -                       |
| AG                       | 0.164     | 2.64  | 2.62     | 2.66     | 0.009 (0.011)  | 0.433                   |
| GT                       | 0.111     | 2.60  | 2.57     | 2.63     | -0.033 (0.015) | 0.027                   |
| AT                       | 0.007     | 2.86  | 2.81     | 2.92     | 0.232 (0.027)  | 1.377×10 <sup>-12</sup> |
| Global <i>p</i> value    |           |       |          |          |                | 0.008                   |
| Log <sub>e</sub> insulin |           |       |          |          |                |                         |
| GG                       |           | 0.814 | 0.806    | 0.823    |                |                         |
| AG                       |           | 0.824 | 0.803    | 0.845    | 0.010 (0.012)  | 0.437                   |
| GT                       |           | 0.821 | 0.821    | 0.847    | 0.007 (0.014)  | 0.652                   |
| AT                       |           | 0.882 | 0.882    | 1.012    | 0.068 (0.066)  | 0.302                   |
| Global <i>p</i> value    |           |       |          |          |                | 0.579                   |
| Log <sub>e</sub> HOMA-IR |           |       |          |          |                |                         |
| GG                       |           | 0.087 | 0.078    | 0.096    |                | -                       |
| AG                       |           | 0.099 | 0.077    | 0.121    | 0.012 (0.013)  | 0.359                   |
| GT                       |           | 0.090 | 0.063    | 0.118    | 0.003 (0.016)  | 0.834                   |
| AT                       |           | 0.159 | 0.015    | 0.304    | 0.072 (0.074)  | 0.325                   |
| Global <i>p</i> value    |           |       |          |          |                | 0.560                   |
| HOMA-B                   |           |       |          |          |                |                         |
| GG                       |           | 37.18 | 35.99    | 38.37    |                | -                       |
| AG                       |           | 36.69 | 33.62    | 39.75    | -0.488 (1.803) | 0.786                   |

| <b>rs553668/ rs10885122</b>      | <b>Frequency</b> | <b>Mean</b> | <b>Lower CI</b> | <b>Upper CI</b> | <b>B (SE)</b>  | <b><i>p</i> value</b> |
|----------------------------------|------------------|-------------|-----------------|-----------------|----------------|-----------------------|
| GT                               |                  | 38.73       | 36.08           | 41.38           | 1.552 (1.416)  | 0.273                 |
| AT                               |                  | 40.48       | 18.39           | 62.58           | 3.307 (11.256) | 0.769                 |
| Global <i>p</i> value            |                  |             |                 |                 |                | 0.600                 |
| Log <sub>e</sub> triacylglycerol |                  |             |                 |                 |                |                       |
| GG                               |                  | 0.121       | 0.113           | 0.130           |                | -                     |
| AG                               |                  | 0.135       | 0.115           | 0.154           | 0.014 (0.012)  | 0.243                 |
| GT                               |                  | 0.147       | 0.122           | 0.172           | 0.026 (0.014)  | 0.070                 |
| AT                               |                  | 0.159       | 0.021           | 0.298           | 0.038 (0.070)  | 0.588                 |
| Global <i>p</i> value            |                  |             |                 |                 |                | 0.182                 |
| Systolic BP                      |                  |             |                 |                 |                |                       |
| GG                               |                  | 60.77       | 60.52           | 61.02           |                | -                     |
| AG                               |                  | 61.60       | 61.00           | 62.20           | 0.831 (0.349)  | 0.017                 |
| GT                               |                  | 61.01       | 60.30           | 61.71           | 0.239 (0.400)  | 0.550                 |
| AT                               |                  | 64.02       | 60.10           | 67.95           | 3.254 (1.995)  | 0.103                 |
| Global <i>p</i> value            |                  |             |                 |                 |                | 0.019                 |
| Diastolic BP                     |                  |             |                 |                 |                |                       |
| GG                               |                  | 40.31       | 40.15           | 40.46           |                | -                     |
| AG                               |                  | 40.65       | 40.27           | 41.03           | 0.345 (0.224)  | 0.123                 |
| GT                               |                  | 40.42       | 39.96           | 40.87           | 0.112 (0.257)  | 0.664                 |
| AT                               |                  | 43.43       | 41.09           | 45.76           | 3.123 (1.187)  | 0.009                 |
| Global <i>p</i> value            |                  |             |                 |                 |                | 0.021                 |

Mean values are for one copy of the haplotype
