# Supplementary material for: Variants of ADRA2A are associated with fasting glucose, blood pressure, body mass index and type 2 diabetes risk: meta-analysis of four prospective studies
Source: PubMed Central journal article supplement — Diabetologia. 2011 Apr 1;54(7):1710–9. doi: 10.1007/s00125-011-2108-6 (PMC3110279; doi:10.1007/s00125-011-2108-6), 2011-04-01
Supplement: 125_2011_2108_MOESM3_ESM.pdf [file 125_2011_2108_MOESM3_ESM.pdf]

## Electronic supplementary material

**ESM Table 2** *ADRA2A* SNPs present on the IBC 50 K chip showing their chromosome position, allele, minor allele frequencies and the call rate in WHII.

| SNP        | Chromosome | Position  | A1 | A2 | MAF      | Genotyped (%) |
|------------|------------|-----------|----|----|----------|---------------|
| rs17186196 | 10         | 112821777 | G  | A  | 0.10     | 0.99          |
| rs638019   | 10         | 112831829 | A  | G  | 0.28     | 0.99          |
| rs11195417 | 10         | 112831994 | A  | C  | 0.11     | 0.99          |
| rs17128356 | 10         | 112832225 | A  | G  | 0.05     | 0.99          |
| rs35468157 | 10         | 112833433 | 0  | G  | 0        | 0.99          |
| rs7096359  | 10         | 112833561 | G  | A  | 0.105    | 0.99          |
| rs491589   | 10         | 112834632 | A  | G  | 0.165    | 0.99          |
| rs35844011 | 10         | 112834763 | 0  | G  | 0        | 1             |
| rs11195418 | 10         | 112835159 | G  | A  | 0.045    | 0.99          |
| rs521674   | 10         | 112835590 | T  | A  | 0.285    | 0.99          |
| rs36022820 | 10         | 112836572 | G  | A  | 0.03     | 0.99          |
| rs33931318 | 10         | 112839171 | C  | G  | 0.000093 | 0.99          |
| rs11195419 | 10         | 112839368 | A  | C  | 0.113    | 0.99          |
| rs553668   | 10         | 112839579 | A  | G  | 0.173    | 0.99          |
| rs13306146 | 10         | 112840171 | G  | A  | 0.013    | 1             |
| rs36069680 | 10         | 112842961 | 0  | A  | 0        | 0.99          |
| rs602618   | 10         | 112843085 | C  | A  | 0.29     | 0.99          |
| rs35607325 | 10         | 112843112 | 0  | A  | 0        | 0.99          |
| rs35941526 | 10         | 112843758 | 0  | G  | 0        | 0.99          |
| rs11815669 | 10         | 112844268 | G  | A  | 0.11     | 0.99          |

Concordance rates were >99.5%

ICB, ITMAT-Broad-CARe; MAF, minor allele frequency
