# Supplementary material for: Variants of ADRA2A are associated with fasting glucose, blood pressure, body mass index and type 2 diabetes risk: meta-analysis of four prospective studies
Source: PubMed Central journal article supplement — Diabetologia. 2011 Apr 1;54(7):1710–9. doi: 10.1007/s00125-011-2108-6 (PMC3110279; doi:10.1007/s00125-011-2108-6), 2011-04-01

Electronic supplementary material

ESM Fig. 3

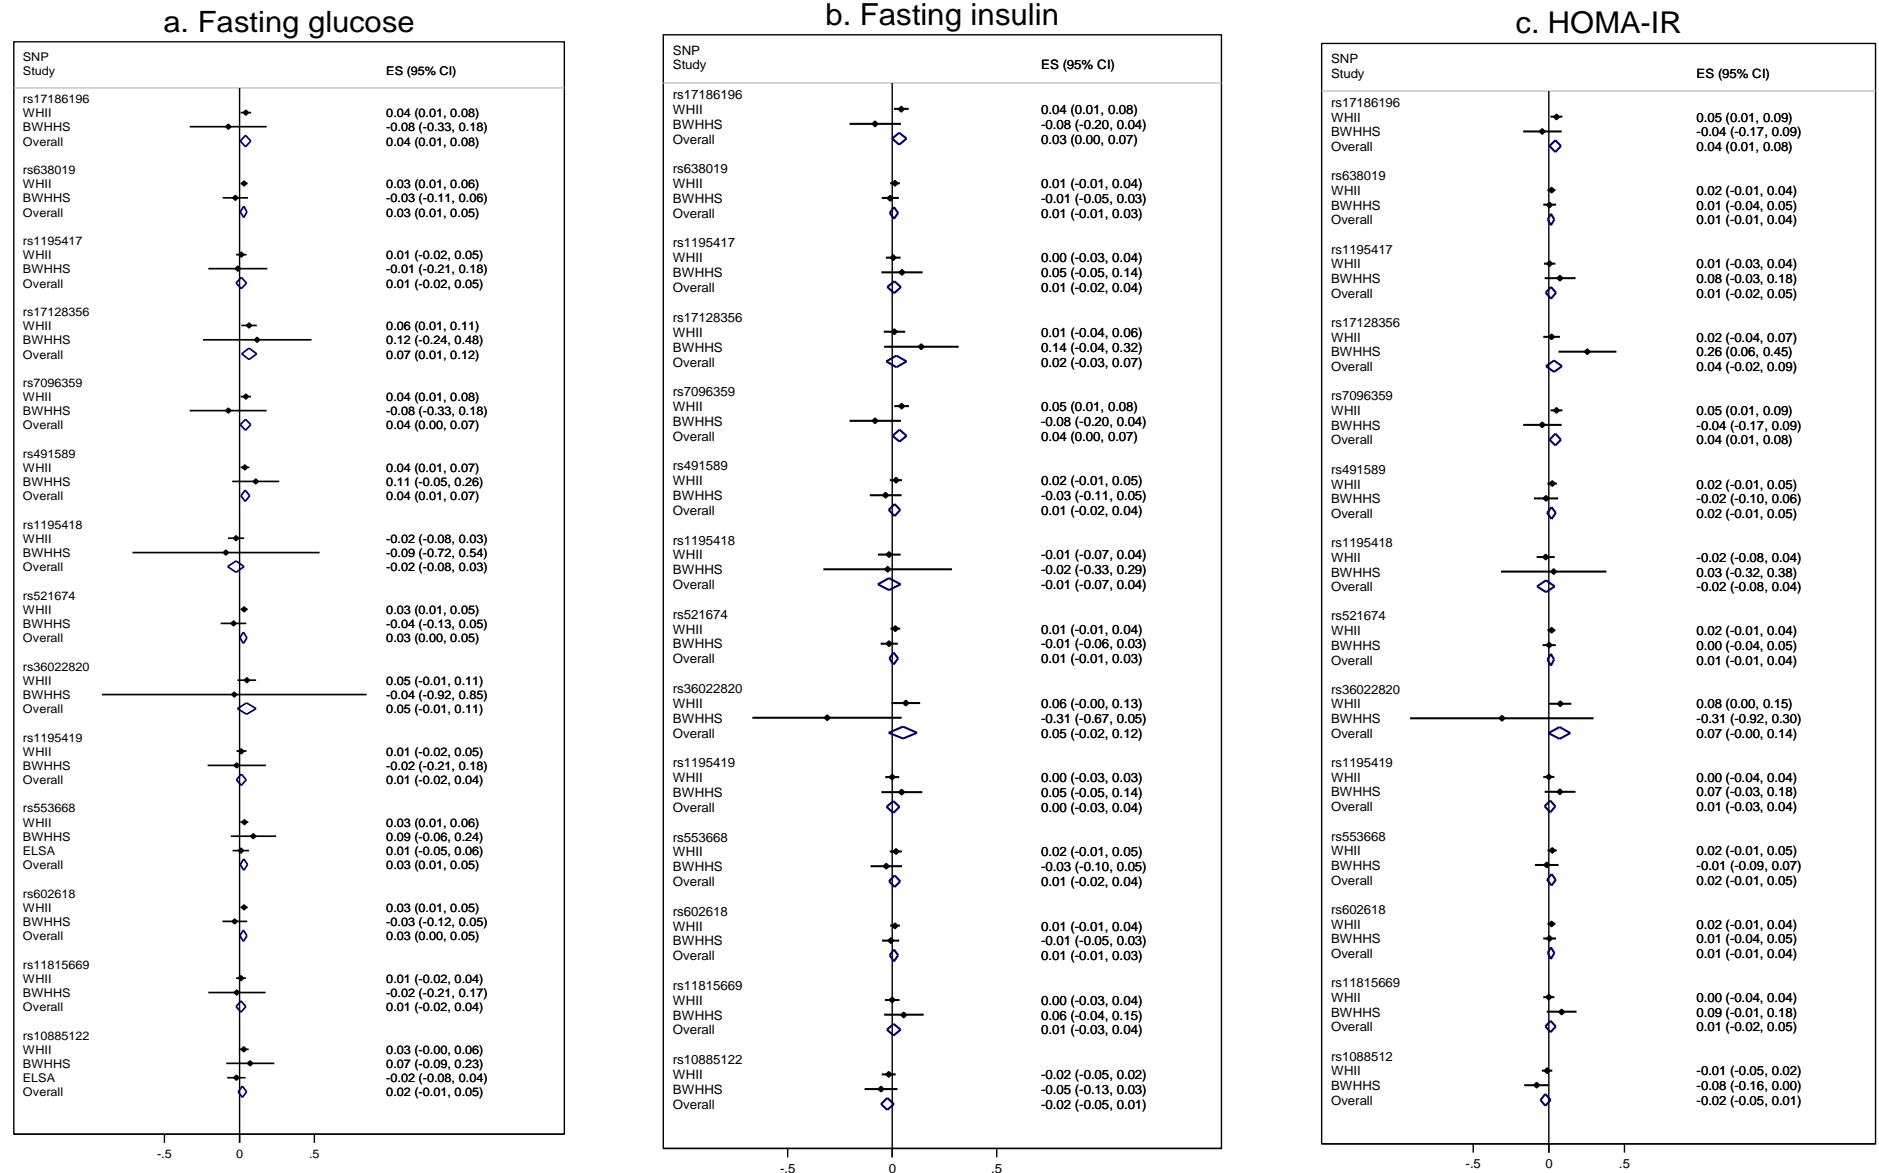

### d. Systolic blood pressure

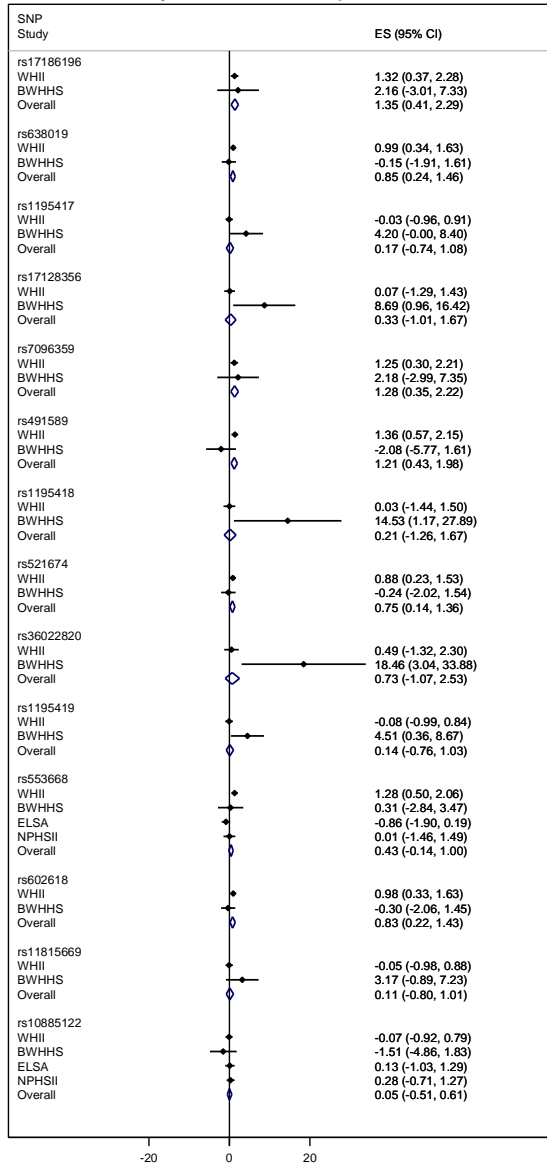

### e. Diastolic blood pressure

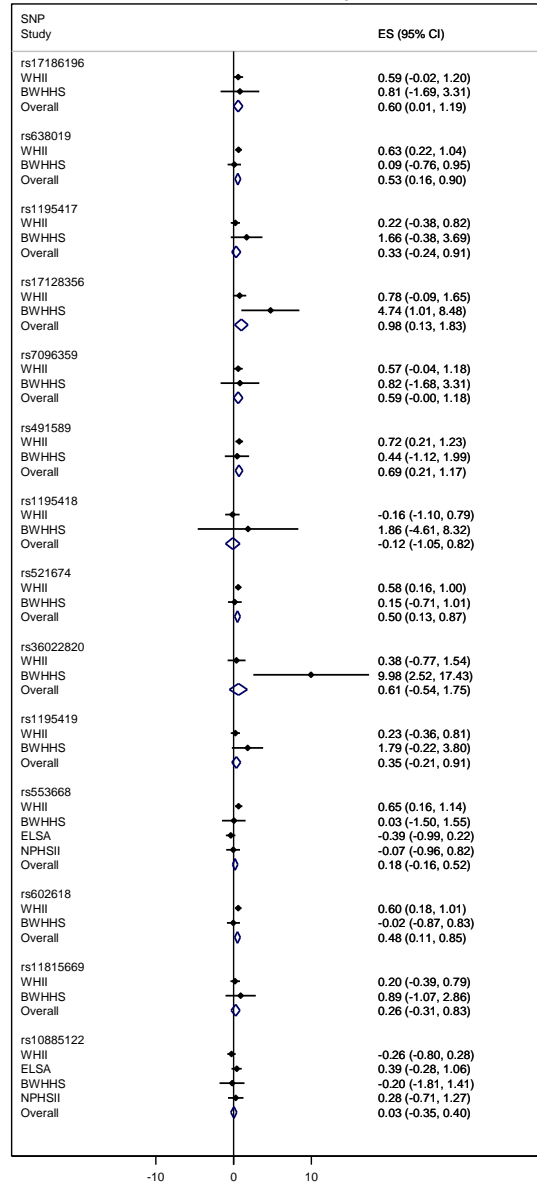

### f. BMI

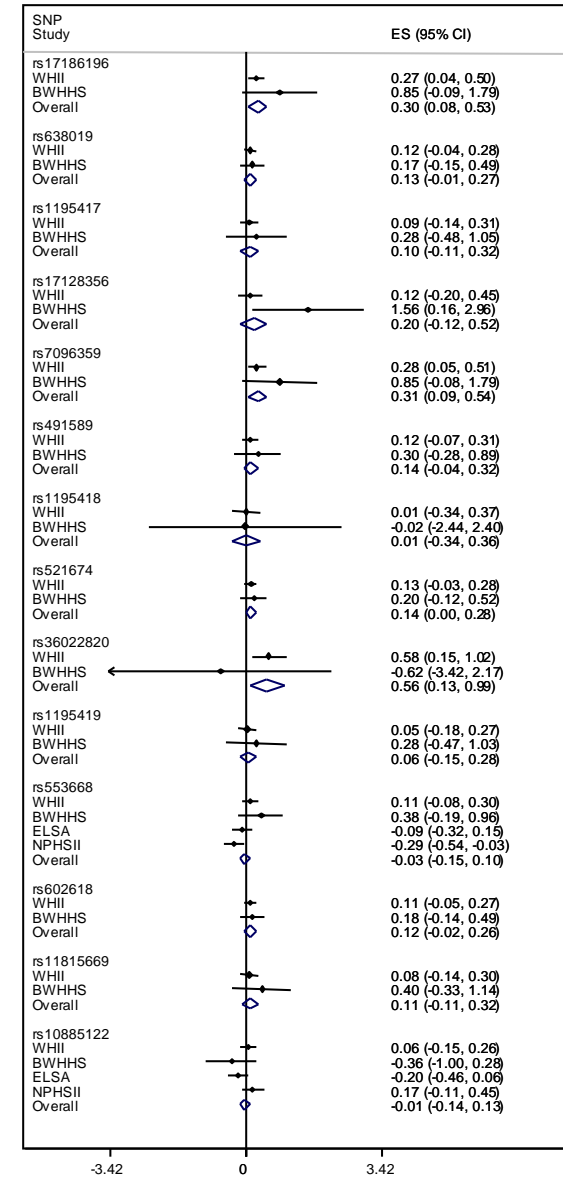

### g. T2D

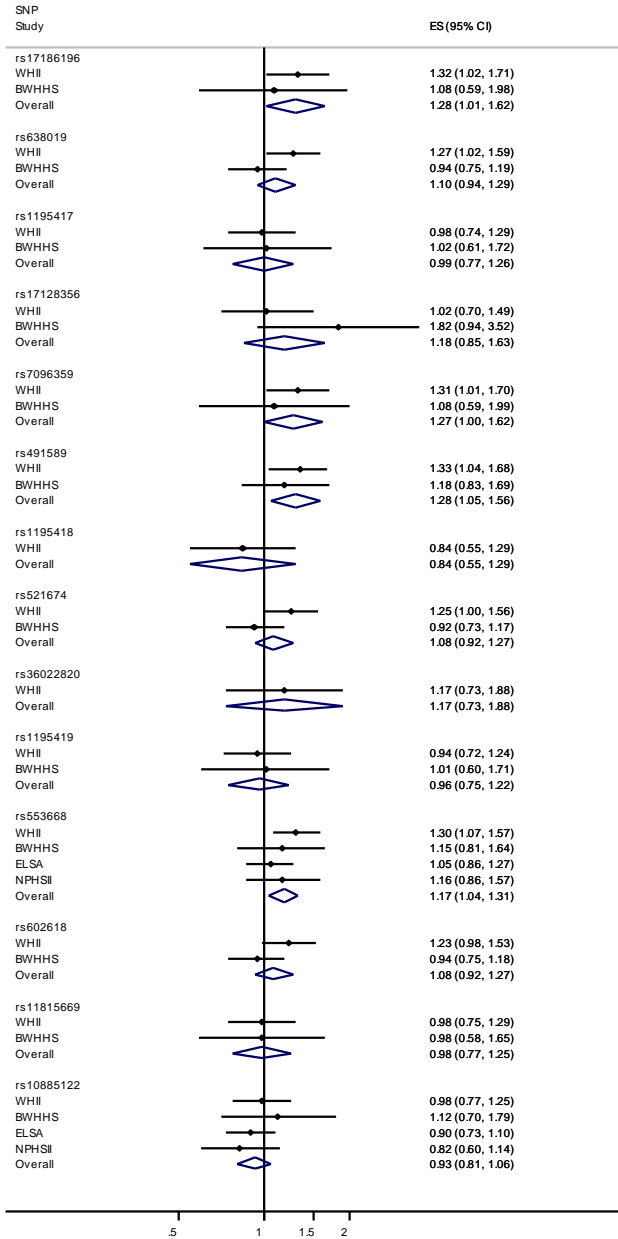

Supplement: 125_2011_2108_MOESM7_ESM.pdf [file 125_2011_2108_MOESM7_ESM.pdf]
