# Supplementary figures and images for: Variants of ADRA2A are associated with fasting glucose, blood pressure, body mass index and type 2 diabetes risk: meta-analysis of four prospective studies
Source: Springer Nature journal article supplement (doi:10.1007/s00125-011-2108-6), 2011-03-31

Electronic supplementary material

ESM Fig 2.

**a**

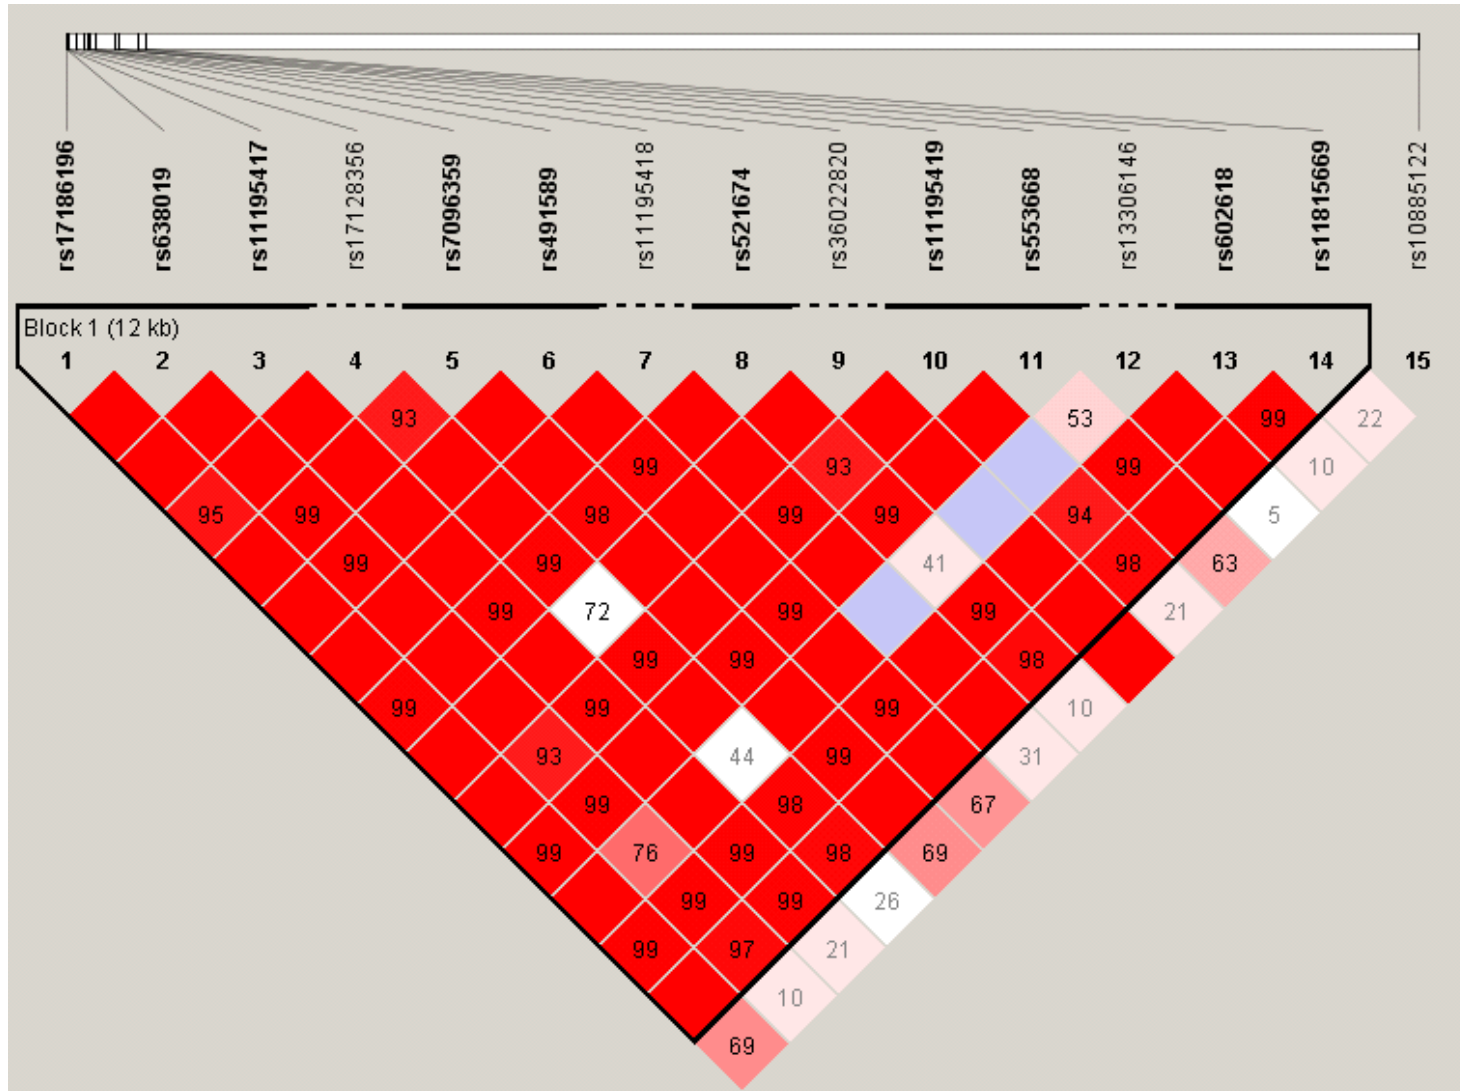

**b**

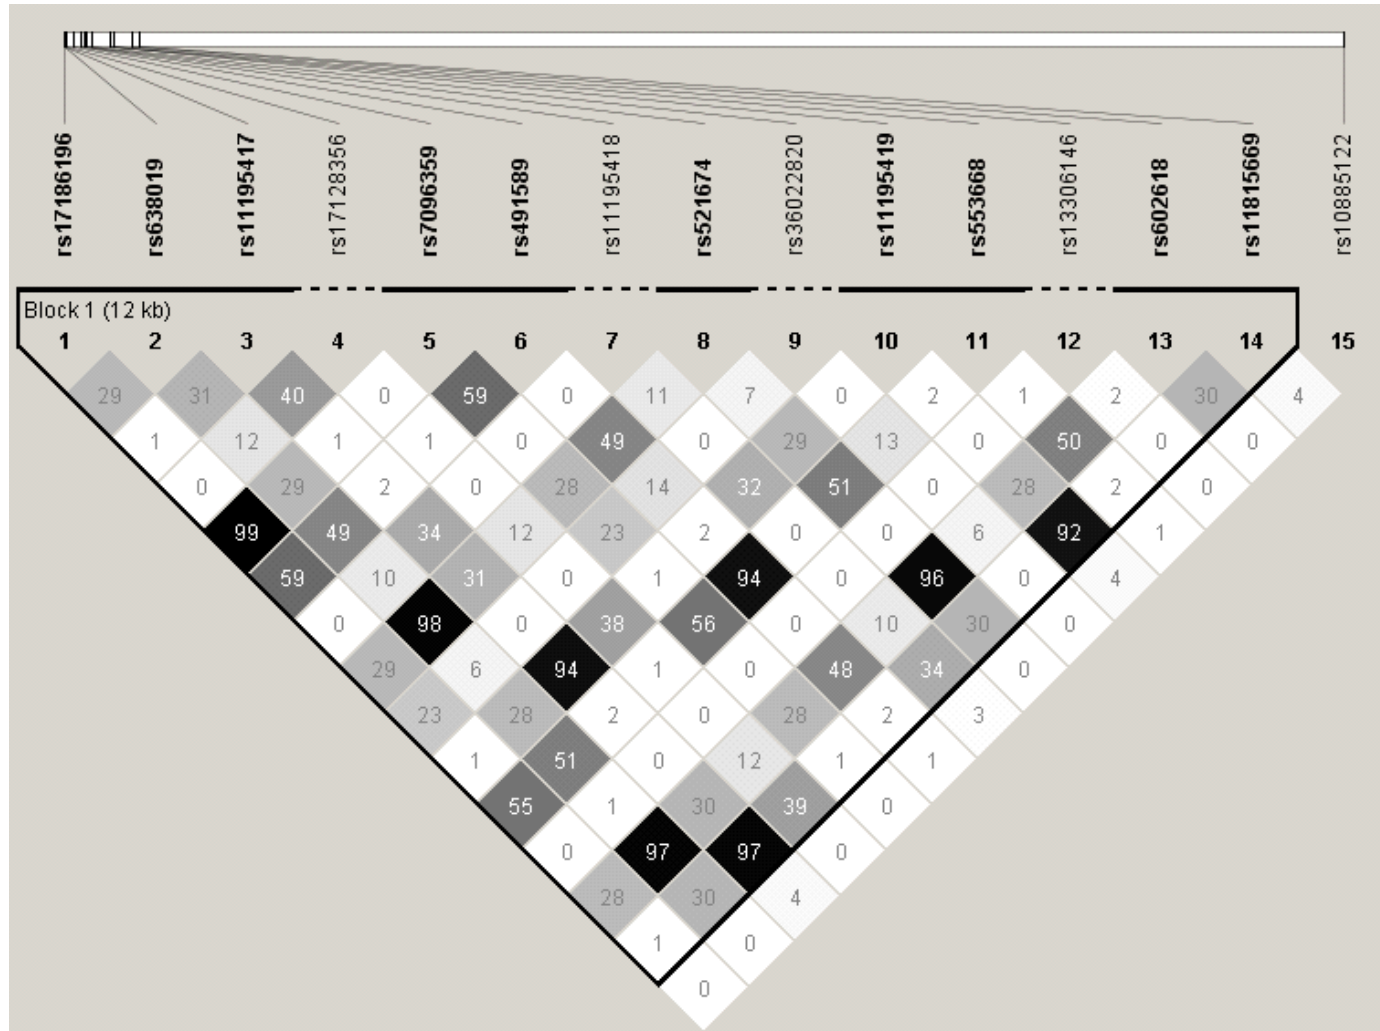

Supplement: MOESM6 [file 125_2011_2108_MOESM6_ESM.pdf]
